# Supplementary material for: Exploring how non-clinical factors in childbirth care shape users’ experiences in public health facilities in rural Chiapas, Mexico: a qualitative study using the WHO health systems responsiveness framework
Source: PubMed Central journal article supplement (PMC10905866; doi:10.1186/s12884-024-06357-7), 2024-02-29
Supplement: 12884_2024_6357_MOESM1_ESM.pdf [file 12884_2024_6357_MOESM1_ESM.pdf]

## Consolidated criteria for reporting qualitative studies (COREQ): 32-item checklist

| No                                                     | Item                                     | Guide questions/description                                      | Page where the information is included |
|--------------------------------------------------------|------------------------------------------|------------------------------------------------------------------|----------------------------------------|
| <b>Domain 1:<br/>Research team<br/>and reflexivity</b> |                                          |                                                                  |                                        |
| Personal<br>Characteristics                            |                                          |                                                                  |                                        |
| 1.                                                     | Interviewer/facilitator                  | Which author/s conducted the interview or focus group?           | 7                                      |
| 2.                                                     | Credentials                              | What were the researcher's credentials? <i>E.g. PhD, MD</i>      | 7                                      |
| 3.                                                     | Occupation                               | What was their occupation at the time of the study?              | 7                                      |
| 4.                                                     | Gender                                   | Was the researcher male or female?                               | 7                                      |
| 5.                                                     | Experience and training                  | What experience or training did the researcher have?             | 7                                      |
| Relationship<br>with<br>participants                   |                                          |                                                                  |                                        |
| 6.                                                     | Relationship established                 | Was a relationship established prior to study commencement?      | 7                                      |
| 7.                                                     | Participant knowledge of the interviewer | What did the participants know about the researcher? <i>e.g.</i> | 7                                      |

| No                            | Item                                  | Guide questions/description                                                                                                                                     | Page where the information is included |
|-------------------------------|---------------------------------------|-----------------------------------------------------------------------------------------------------------------------------------------------------------------|----------------------------------------|
|                               |                                       | <i>personal goals, reasons for doing the research</i>                                                                                                           |                                        |
| 8.                            | Interviewer characteristics           | What characteristics were reported about the interviewer/facilitator? e.g. <i>Bias, assumptions, reasons and interests in the research topic</i>                | 29                                     |
| <b>Domain 2: study design</b> |                                       |                                                                                                                                                                 |                                        |
| Theoretical framework         |                                       |                                                                                                                                                                 |                                        |
| 9.                            | Methodological orientation and Theory | What methodological orientation was stated to underpin the study? e.g. <i>grounded theory, discourse analysis, ethnography, phenomenology, content analysis</i> | 5-6                                    |
| Participant selection         |                                       |                                                                                                                                                                 |                                        |
| 10.                           | Sampling                              | How were participants selected? e.g. <i>purposive, convenience, consecutive, snowball</i>                                                                       | 6                                      |
| 11.                           | Method of approach                    | How were participants approached? e.g. <i>face-to-face, telephone, mail, email</i>                                                                              | 6                                      |

| No              | Item                         | Guide questions/description                                                              | Page where the information is included |
|-----------------|------------------------------|------------------------------------------------------------------------------------------|----------------------------------------|
| 12.             | Sample size                  | How many participants were in the study?                                                 | 6                                      |
| 13.             | Non-participation            | How many people refused to participate or dropped out? Reasons?                          | 6                                      |
| Setting         |                              |                                                                                          |                                        |
| 14.             | Setting of data collection   | Where was the data collected? <i>e.g. home, clinic, workplace</i>                        | 6                                      |
| 15.             | Presence of non-participants | Was anyone else present besides the participants and researchers?                        | 6                                      |
| 16.             | Description of sample        | What are the important characteristics of the sample? <i>e.g. demographic data, date</i> | 8-9                                    |
| Data collection |                              |                                                                                          |                                        |
| 17.             | Interview guide              | Were questions, prompts, guides provided by the authors? Was it pilot tested?            | 7                                      |
| 18.             | Repeat interviews            | Were repeat interviews carried out? If yes, how many?                                    | 7                                      |
| 19.             | Audio/visual recording       | Did the research use audio or visual recording to collect the data?                      | 7                                      |

| No                                          | Item                           | Guide questions/description                                              | Page where the information is included |
|---------------------------------------------|--------------------------------|--------------------------------------------------------------------------|----------------------------------------|
| 20.                                         | Field notes                    | Were field notes made during and/or after the interview or focus group?  | 7                                      |
| 21.                                         | Duration                       | What was the duration of the interviews or focus group?                  | 7                                      |
| 22.                                         | Data saturation                | Was data saturation discussed?                                           | 6                                      |
| 23.                                         | Transcripts returned           | Were transcripts returned to participants for comment and/or correction? | 6-7                                    |
| <b>Domain 3:<br/>analysis and findingsz</b> |                                |                                                                          |                                        |
| Data analysis                               |                                |                                                                          |                                        |
| 24.                                         | Number of data coders          | How many data coders coded the data?                                     | 7-8                                    |
| 25.                                         | Description of the coding tree | Did authors provide a description of the coding tree?                    | 7-8                                    |
| 26.                                         | Derivation of themes           | Were themes identified in advance or derived from the data?              | 7-8                                    |
| 27.                                         | Software                       | What software, if applicable, was used to manage the data?               | 7-8                                    |

| <b>No</b> | <b>Item</b>                  | <b>Guide questions/description</b>                                                                                                          | <b>Page where the information is included</b> |
|-----------|------------------------------|---------------------------------------------------------------------------------------------------------------------------------------------|-----------------------------------------------|
| 28.       | Participant checking         | Did participants provide feedback on the findings?                                                                                          | 7-8                                           |
| Reporting |                              |                                                                                                                                             |                                               |
| 29.       | Quotations presented         | Were participant quotations presented to illustrate the themes / findings? Was each quotation identified?<br><i>e.g. participant number</i> | 8-25                                          |
| 30.       | Data and findings consistent | Was there consistency between the data presented and the findings?                                                                          | 8-25                                          |
| 31.       | Clarity of major themes      | Were major themes clearly presented in the findings?                                                                                        | 8-25                                          |
| 32.       | Clarity of minor themes      | Is there a description of diverse cases or discussion of minor themes?                                                                      | 8-25                                          |
